# Supplementary material for: Bis-Fischer indole[3,2-b]carbazole modification of [10]cycloparaphenylenes: tuning optical properties through rigid substitution
Source: Royal Society of Chemistry journal article supplement (doi:10.1039/d5qo00539f), 2025-01-01
Supplement: d5qo00539f1.pdf [file d5qo00539f1.pdf]

*Supporting Information*

**Indole[3,2-*b*]carbazole Modified [10]Cycloparaphenylenes: Tuning  
Optical Properties Through Rigid Substitution**

Wanchun Duan,<sup>a</sup> Dong-ming Chen,<sup>b</sup> Dang Zhen,<sup>a</sup> Shidong He,<sup>a</sup> Wanqun Hu,<sup>c</sup>  
Lvyuan Hao,<sup>a</sup> Xin Xu<sup>\*a</sup>

<sup>a</sup> CAS Key Laboratory of Materials for Energy Conversion, Department of Materials  
Science and Engineering, University of Science and Technology of China, Hefei,  
230026, China

<sup>b</sup> Department of Chemical Physics, University of Science and Technology of China,  
Hefei, 230026, China

<sup>c</sup> School of Chemistry and Materials Science, University of Science and Technology  
of China, Hefei, 230026, China

\*Corresponding author: [xuxin@ustc.edu.cn](mailto:xuxin@ustc.edu.cn)

Tel: 86-551-63600824

Fax: 86-551-63601592

---

|                                                   |           |
|---------------------------------------------------|-----------|
| <b>1. Materials and General Information .....</b> | <b>2</b>  |
| <b>2. Synthetic details .....</b>                 | <b>3</b>  |
| <b>3. Photophysical studies.....</b>              | <b>12</b> |
| <b>4. Computational detail. ....</b>              | <b>14</b> |

## 1. Materials and General Information

NMR spectra were recorded on a Bruker BioSpin ( $^1\text{H}$  400 MHz,  $^{13}\text{C}$  100 MHz) spectrometer. Chemical shifts were reported as the delta scale in ppm relative to tetramethylsilane ( $\delta = 0.00$  ppm),  $\text{CDCl}_3$  ( $\delta = 7.26$  ppm) for  $^1\text{H}$  NMR and  $\text{CDCl}_3$  ( $\delta = 77.0$  ppm) for  $^{13}\text{C}$  NMR. Data were reported as follows: chemical shift, multiplicity (s = singlet, d = doublet, t = triplet, m = multiplet), coupling constant (Hz), and integration. High resolution mass spectrometry (HR-MS) analyses were carried out using MALDI-TOF-MS techniques. All solvents for syntheses were dried by distillation under nitrogen prior to use (tetrahydrofuran and 1,4-dioxane were distilled after reflux with sodium under nitrogen). Other chemicals were obtained from commercial suppliers (Innochem or Acros). Air-sensitive reactions were all carried out under argon.

## 2. Synthetic details

**Synthesis of compound 12.** Compound **11** was prepared according to the published procedure.<sup>1, 2</sup>

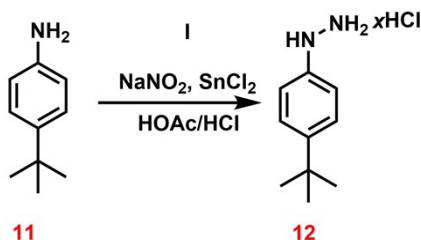

A suspension of *tert*-butylaniline **11** (10 g, 67 mmol) in acetic acid (55 mL) and concentrated HCl (160 mL) was treated with an ice cold solution of NaNO<sub>2</sub> (4.62 g, 67 mmol) in H<sub>2</sub>O (26 mL). The temperature was maintained below -10 °C. At the same time stannous dichloride dehydrate (45.4 g, 201 mmol) was dissolved in concentrated HCl (33 mL) and the solution cooled to a temperature below -15 °C under a nitrogen atmosphere. To this mixture the diazonium mixture is slowly added over a period of 2 h and the temperature always kept below -15 °C. The reaction was completed in an ice-bath overnight. The product which was obtained after filtration was purified by dissolving the stannous salts with boiling HCl. The solid compound **12** (11.2 g, 56 mmol, 84%) was collected and dried under vacuum. An analytical sample was obtained by treating the hydrochloride with aqueous NaOH, extracting the free base into ether, and precipitating the hydrochloride from the dried ethereal phase with freshly prepared ethereal HCl solution.

<sup>1</sup>H NMR (DMSO-*d*<sub>6</sub>, 400 MHz):  $\delta$  (ppm) 10.23 (br s, 3H), 7.30 (d,  $J = 7.9$  Hz, 2H), 6.95 (d,  $J = 8.0$  Hz, 2H), 1.24 (s, 9H);

### Synthesis of compound 9.

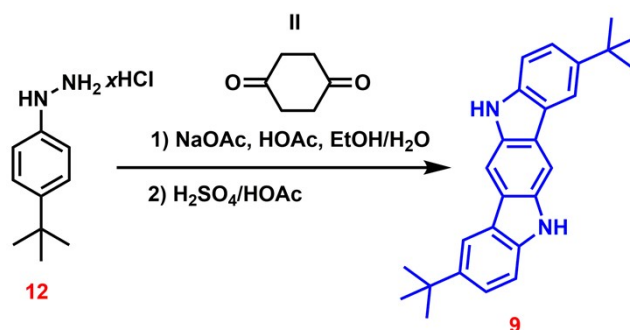

Compound **12**<sup>3</sup> (4.40 g, 21.92 mmol) was suspended in ethanol (32 mL) at room temperature. A solution of sodium acetate (5.39 g, 65.76 mmol) in water (16 mL) was added. The mixture was stirred at room temperature of 15 minutes. To this mixture, a solution of cyclohexane-1,4-dione (1.23 g, 10.96 mmol) in ethanol (10 mL) was added dropwise over 5 minutes. After the addition, acetic acid (8 mL) was added in one portion. The mixture was stirred for 1 hour at 50 °C and 1 hour at 0 °C. Subsequently, the reaction mixture was filtered to yield a pale yellow solid. The solid was collected and further dried under vacuum for 2 hours, before it was added portion wise over 10 minutes to a mixture of acetic acid (12 mL) and sulfuric acid (98%, 3 mL) at 10 °C. The mixture was warmed up to room temperature and stirred for another 10 minutes. The temperature was then further increased to 65 °C and maintained for 30 minutes. Subsequently, the mixture was cooled down to room temperature and poured into water (100 mL) at 0 °C. The resulting precipitate was filtered and washed extensively with methanol to give the pure product **9** as a gray solid (825 mg, 20%).

<sup>1</sup>H NMR (CDCl<sub>3</sub>, 400 MHz):  $\delta$  (ppm) 8.13 (d,  $J$  = 2.0 Hz, 2H), 8.04 (s, 2H), 7.50 (dd,  $J$  = 8.5 Hz, 1.9 Hz, 2H), 7.38 (d,  $J$  = 8.5 Hz, 2H), 1.46 (s, 18H), the signals of NH

protons were not observed.

### Synthesis of compound **13**<sup>3</sup>.

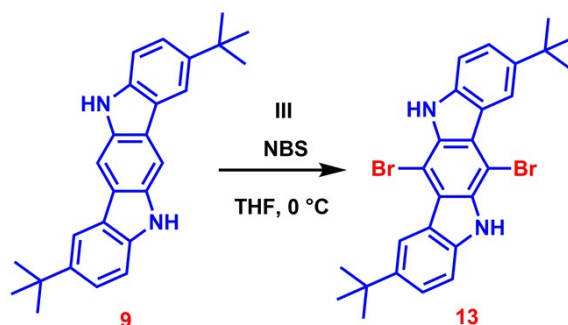

Compound **9** (921 mg, 2.5 mmol) was dissolved in anhydrous THF (30 mL) at 0 °C. To this mixture, a freshly prepared solution of NBS (445 mg, 2.5 mmol) in THF (15 mL) was added dropwise. The mixture was stirred at 0 °C for 10 minutes. Subsequently, another freshly prepared solution of NBS (445 mg, 2.5 mmol) in THF (15 mL) was added dropwise. The mixture was warmed up slowly and stirred at room temperature overnight. The solvent was removed under reduced pressure. The residue was dissolved in CH<sub>2</sub>Cl<sub>2</sub>. The organic solution was washed by water twice and dried with MgSO<sub>4</sub>. The crude product was purified through column chromatography (SiO<sub>2</sub>, hexane/ethyl acetate 19:1 to 7:1), to give **13** as a pale yellow crystalline solid (1.10 g, 83%).

<sup>1</sup>H NMR (CDCl<sub>3</sub>, 400 MHz):  $\delta$  (ppm) 8.80 (d, *J* = 1.8 Hz, 2H), 8.24 (s, 2H), 7.60 (dd, *J* = 8.6, 1.9 Hz, 2H), 7.46 (dd, *J* = 8.6, 0.6 Hz, 2H), 1.48 (s, 18H).

### Synthesis of compound **14**<sup>4</sup>.

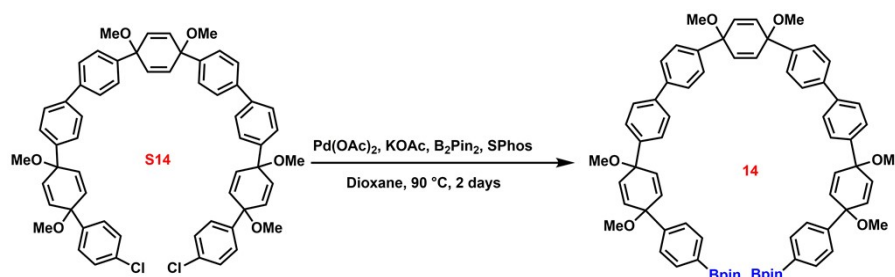

To a round-bottom flask (100 mL) were added dichloride **S14** (2.40 g, 2.55 mmol) which was synthesized following the literature procedure, bis(pinacolato)diboron (3.88 g, 15.3 mmol), anhydrous KOAc (2.50 g, 25.5 mmol), and dry Dioxane (20 mL). The mixture was bubbled with argon for 15 minutes then  $\text{Pd}(\text{OAc})_2$  (50 mg, 0.22 mmol) and Sphos ligand (366 mg, 0.89 mmol,) were added quickly and the mixture was further degassed by argon bubbling for 15 minutes. The flask was sealed and heated at  $90\text{ }^\circ\text{C}$  for 48 hours. At the conclusion of the reaction, the reaction mixture was allowed to cool to room temperature. Water (100 mL) was added, and the reaction mixture was extracted with ethyl acetate ( $3\times 50\text{ mL}$ ). The combined organic layers were washed with water (100 mL) and brine (100 mL), dried over anhydrous  $\text{Na}_2\text{SO}_4$ , and concentrated under reduced pressure. The resulting crude material was purified by silica gel chromatography using 3% acetone in  $\text{CH}_2\text{Cl}_2$  to obtain the product **14** as a white solid (2.3 g, 80%).

$^1\text{H}$  NMR (400 MHz,  $\text{CDCl}_3$ ):  $\delta$  (ppm) 7.75 (d,  $J = 8.0\text{ Hz}$ , 4H), 7.58 – 7.48 (m, 12H), 7.44 (dd,  $J = 8.6, 2.0\text{ Hz}$ , 8H), 6.17 (s, 4H), 6.12 (m,  $J = 3.5\text{ Hz}$ , 8H), 3.51 (s, 6H), 3.45 (s, 12H), 1.31 (s, 24H).

### Synthesis of compound BH-ICZ[10]CPP.

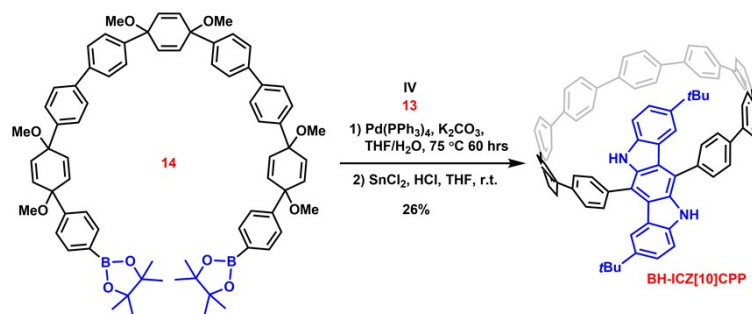

To a solution of compound **14** (209.14 mg, 0.19 mmol), compound **13** (97.80 mg, 0.19 mmol), K<sub>2</sub>CO<sub>3</sub> (155 mg, 1.12 mmol), THF (200 mL) and H<sub>2</sub>O (40 mL) was added Pd(PPh<sub>3</sub>)<sub>4</sub> (35 mg, 0.03 mmol) under argon atmosphere. The resulting solution was stirred at 73 °C for 60 hours and then cooled to room temperature. The solvent was removed under reduced pressure, and the remaining aqueous fraction was extracted with CH<sub>2</sub>Cl<sub>2</sub>, dried over anhydrous MgSO<sub>4</sub>. The solution was concentrated under reduced pressure to afford the crude product as a yellow solid for the next step without further purification.

To a mixture of SnCl<sub>2</sub>·2H<sub>2</sub>O (314.61 mg, 1.39 mmol) and dry THF (45 mL) was added HCl (0.23 mL, 12 mol/L) under an argon atmosphere and the resultant mixture was stirred at room temperature for 30 min. Then the above stannic acid solution was added dropwise to the above crude product with a syringe under an argon atmosphere and stirred at room temperature overnight. After reaction, the mixture was added aqueous sodium hydroxide and the solvent was removed under reduced pressure. Then the remaining aqueous fraction was extracted with CH<sub>2</sub>Cl<sub>2</sub>, dried over anhydrous MgSO<sub>4</sub> and was purified by chromatography on a silica gel column with hexane/CH<sub>2</sub>Cl<sub>2</sub> as the eluent (v/v, 4:1) to give compound **BH-ICZ[10]CPP** as a

yellow solid (58 mg, 20% over two steps).  $^1\text{H}$  NMR ( $\text{CDCl}_3$ , 400 MHz):  $\delta$  (ppm) 8.09 (s, 2H), 7.67 (d,  $J = 8.3$  Hz, 2H), 7.69-7.50 (m, 36H), 7.31 (d,  $J = 8.3$  Hz, 2H), 7.22 (d,  $J = 8.3$  Hz, 2H), 1.26 (s, 18H).  $^{13}\text{C}$  NMR ( $\text{CDCl}_3$ , 100 MHz):  $\delta$  (ppm) 141.53, 140.10, 140.04, 139.18, 139.04, 138.59, 138.20, 138.03, 137.94, 136.05, 131.19, 128.16, 127.83, 127.70, 127.62, 127.43, 127.38, 127.34, 126.73, 122.97, 121.36, 119.15, 117.87, 109.83, 100.10, 34.75, 32.16. HR-MS (MALDI-TOF)  $m/z$  calcd. for  $\text{C}_{80}\text{H}_{62}\text{N}_2$   $[M]^+$ : 1050.4913, found: 1050.4988.

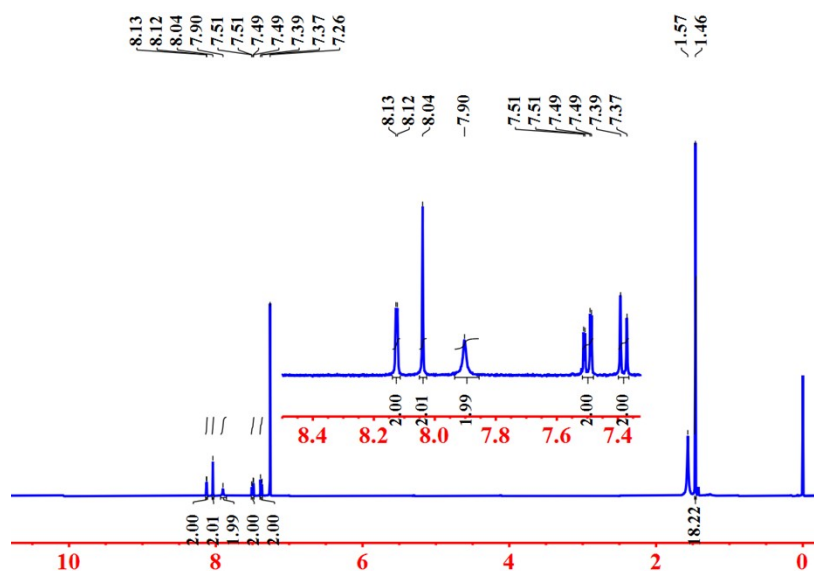

**Figure S1.**  $^1\text{H}$  NMR spectrum of compound **9** (400 MHz,  $\text{CDCl}_3$ ).

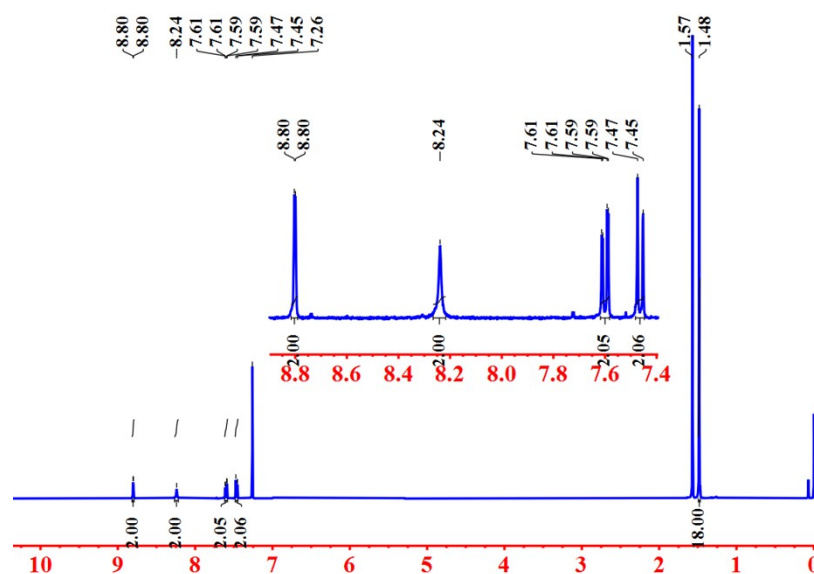



**Figure S2.**  $^1\text{H}$  NMR spectrum of compound **13** (400 MHz,  $\text{CDCl}_3$ ).

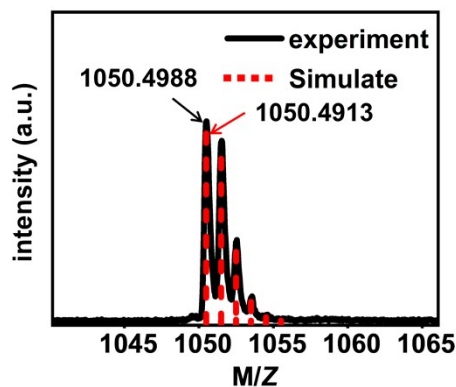

**Figure S3.** MALDI-TOF-MS spectrum (black solid line) and simulated data (red dash line) for compound **BH-ICZ[10]CPP**.

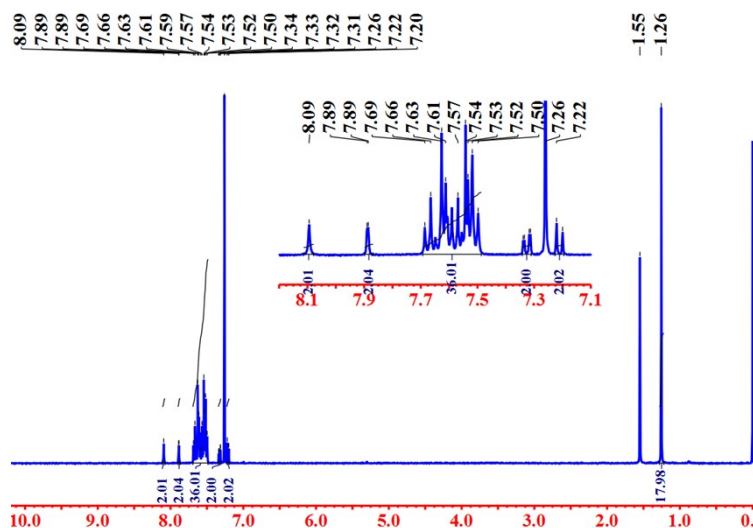

**Figure S4.**  $^1\text{H}$  NMR spectrum of compound **BH-ICZ[10]CPP** (400 MHz,  $\text{CDCl}_3$ ).

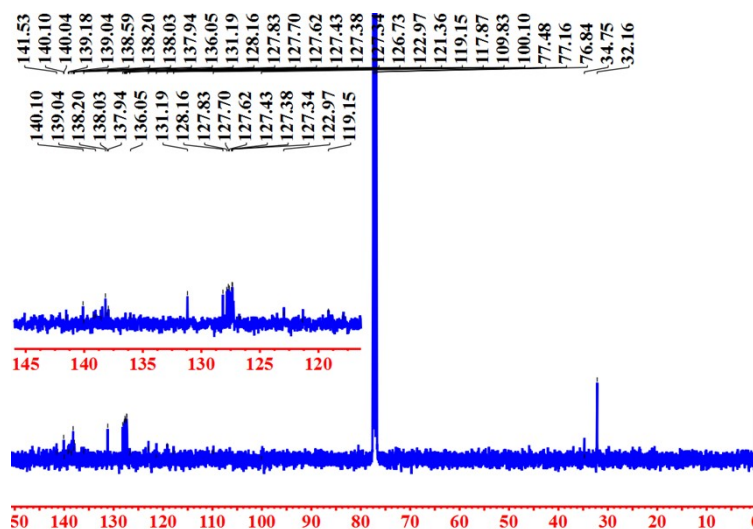

**Figure S5.**  $^{13}\text{C}$  NMR spectrum of compound **BH-ICZ[10]CPP** (100 MHz,  $\text{CDCl}_3$ ).

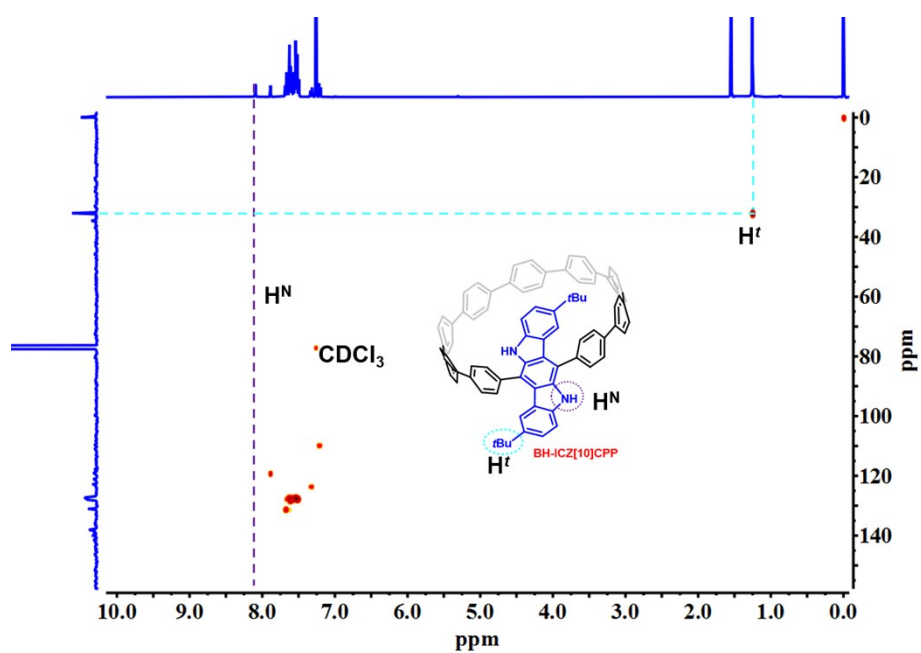

**Figure S6.** Expanded 2D (H, C)-HSQC NMR spectrum (400 MHz,  $\text{CDCl}_3$ ) of **BH-ICZ[10]CPP**.

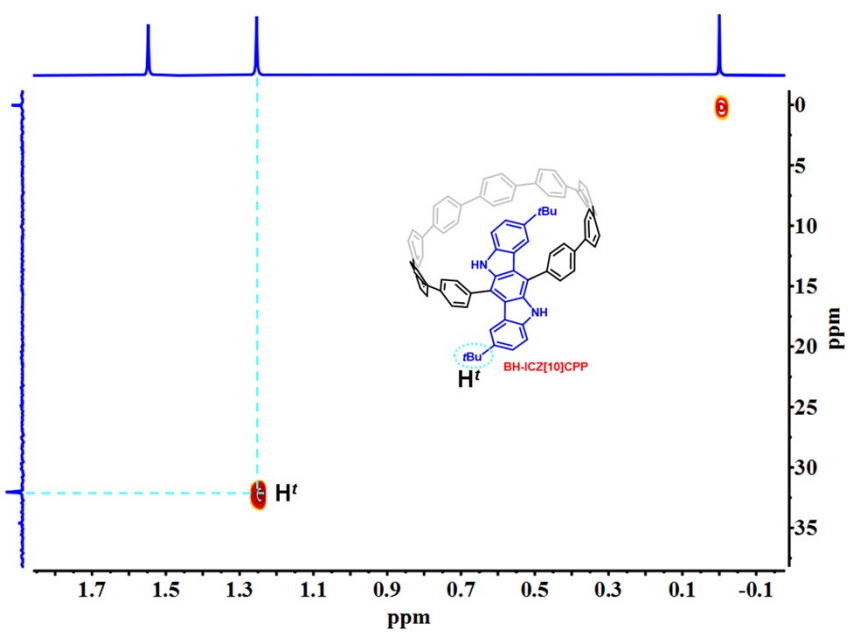

**Figure S7.** Expanded 2D (H, C)-HSQC NMR spectrum (400 MHz,  $\text{CDCl}_3$ ) of **BH-ICZ[10]CPP** in the range of 0-1.35 ppm.

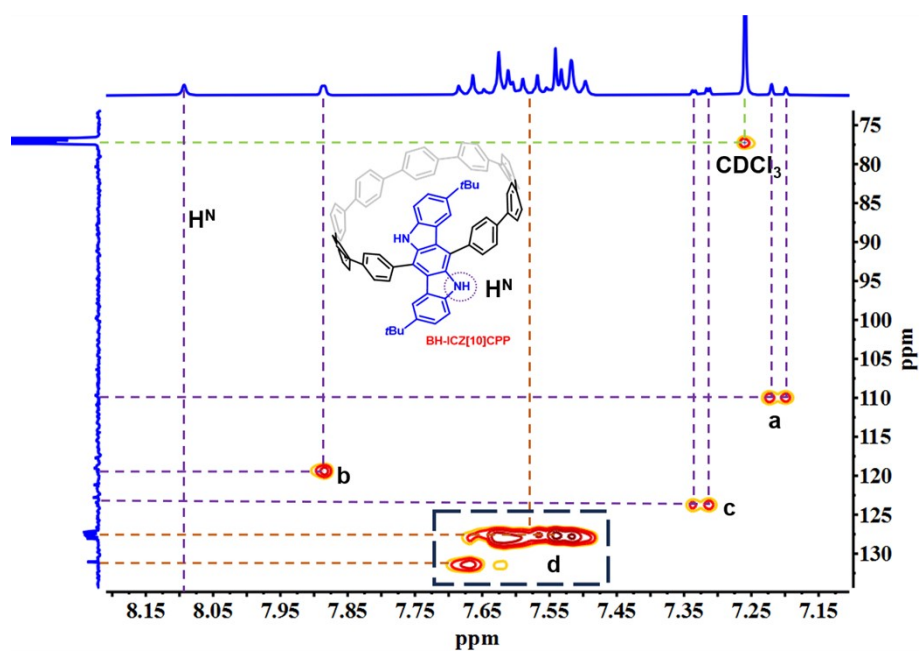

**Figure S8.** Expanded 2D (H, C)-HSQC NMR spectrum (400 MHz, CDCl<sub>3</sub>) of **BH-ICZ[10]CPP** in the range of 7.10-8.20 ppm.

### 3. Photophysical studies.

The fluorescent emission experiments were performed on a F-4600 spectrofluorometer at room temperature. The fluorescence spectrum of **BH-ICZ[10]CPP** was collected under an excitation wavelength at 330 nm. UV-Vis absorption spectrum of **BH-ICZ[10]CPP** was performed on a UV-3600 spectrometer (Shimadzu, Japan) at room temperature, using a quartz cell of 1 mm layer thickness and 1 nm resolution with the samples dissolved in solvents. The fluorescent time-resolved decays were measured on a spectrometer (FLS920, Edinburgh Instruments Ltd.) with TBX picosecond photon detection module (HORIBA Scientific) using time-correlated single-photon counting technique (TCSPC). The sample was excited at 330 nm with a picosecond pulsed diode laser triggered at 3 MHz repetition rate. The detected fluorescence intensity decays were analyzed using a monoexponential model. The measurements were performed at least twice for consistency. **BH-ICZ[10]CPP** was measured in solvents with a concentration of  $5.0 \times 10^{-6}$  M.

## Fluorescence decay lifetime.

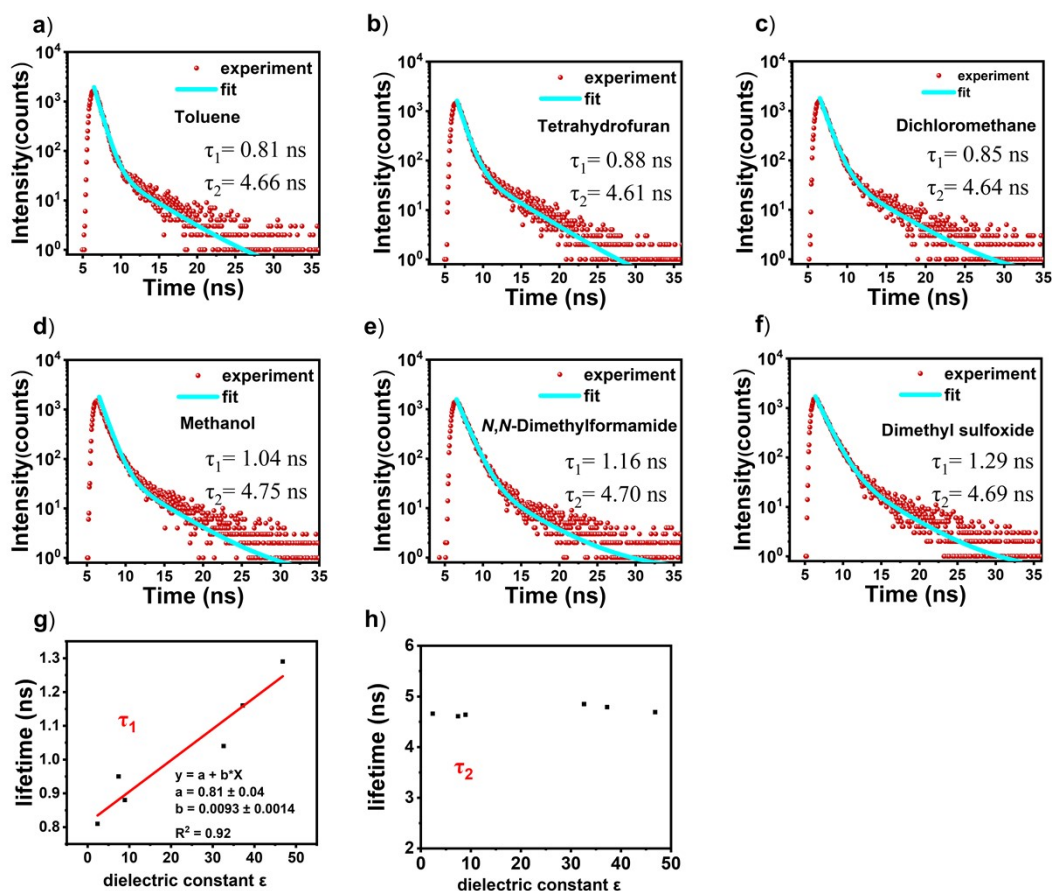

**Figure S9.** Fluorescence decay lifetime of BH-ICZ[10]CPP in different solvents.

**Table S1.** the dielectric constant  $\epsilon$  of BH-ICZ[10]CPP for PLQY in different solvents.

|      | Toluene | THF  | DCM  | MeOH | DMF  | DMSO |
|------|---------|------|------|------|------|------|
| PLQY | 0.75    | 0.61 | 0.92 | 0.50 | 0.58 | 0.54 |

#### 4. Computational detail.

Density functional theory calculations were used to identify the performed by using Gaussian 16 software<sup>5</sup>. Geometrical optimization were carried out at the theoretical level of CAM-B3LYP/6-31G(d, p), where Polarizable continuum model (PCM)<sup>6</sup> methodologies were used for solvent effect. The resultant structures were further validated by frequency analysis without imaginary frequency. The strain energy was calculated using the computational methods reported by K. Itami<sup>7, 8</sup>.

$$SE = E(\text{BH-ICZ[10]CPP}) + 10E(\text{Biphenyl}) - E(\text{the Functional unit}) - 9E(\text{Triphenyl}).$$

Moreover, time-dependent density functional theory (TD-DFT) with CAM-B3LYP/6-31G(d,p)//PCM and gas-phase model, were used to simulate the UV-Vis spectra.

## Harmonic Oscillator Measure of Aromaticity (HOMA)<sup>9</sup>

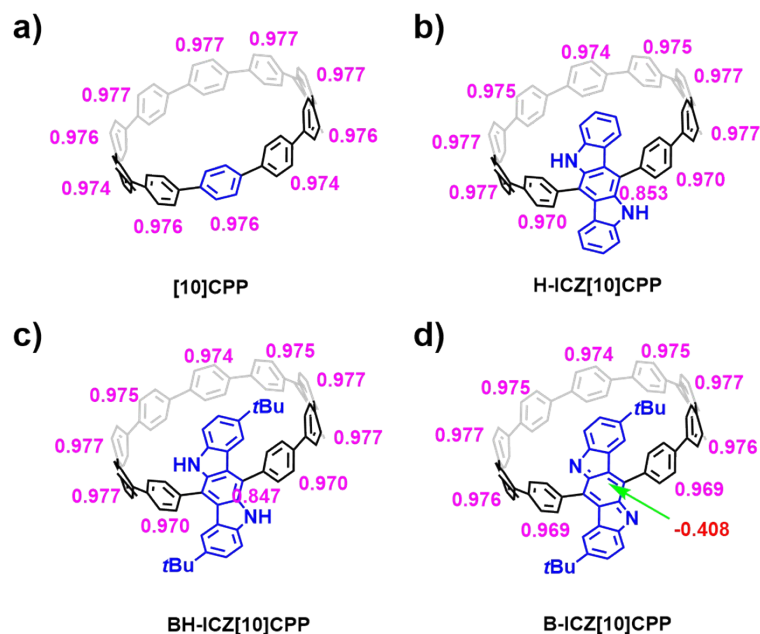

**Figure S10** The HOMA of [10]CPP, H-ICZ[10]CPP, BH-ICZ[10]CPP, and B-ICZ[10]CPP.

**Notice:** If HOMA equals to 1, that means the ring is fully aromatic. While if HOMA equals to 0, that means the ring is completely nonaromatic.

**Average macrocyclic torsion angle  $\alpha$ .**

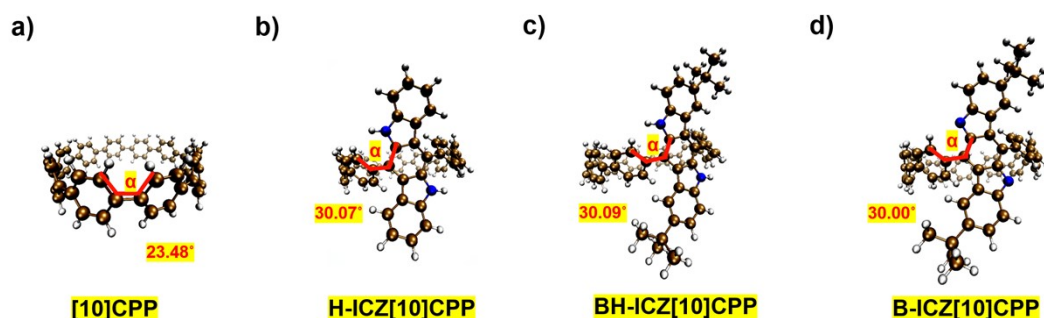

**Figure S11.** Optimized molecular structure of a) [10]CPP, b) H-ICZ[10]CPP and c) BH-ICZ[10]CPP, d) B-ICZ[10]CPP with the average macrocyclic torsion angle  $\alpha$ .

**Table S2** The average torsion angle  $\alpha$  of the molecule under different calculation conditions.

| Angle    | H-ICZ[10]CPP |         |         | BH-ICZ[10]CPP |         |         | B-ICZ[10]CPP |         |         |
|----------|--------------|---------|---------|---------------|---------|---------|--------------|---------|---------|
|          | A            | B       | C       | A             | B       | C       | A            | B       | C       |
| $\alpha$ | 30.86°       | 30.07°  | 28.67°  | 30.89°        | 30.09°  | 28.61°  | 31.42°       | 30.00°  | 29.41°  |
| $\gamma$ | 169.24°      | 170.28° | 167.61° | 169.22°       | 170.70° | 167.91° | 165.54°      | 165.52° | 165.83° |

A, B, and C represent at the theoretical level of CAM-B3LYP/6-31+G(d, p)//gas-phase model, CAM-B3LYP/6-31G(d, p)//gas-phase model, and CAM-B3LYP/6-31G(d, p)//PCM, respectively.

**Table S3** The average torsion angle  $\alpha$  of BH-ICZ[10]CPP in different solvents.

| angle    | gas-phase | Toluene | THF     | DCM     | MeOH    | DMF     | DMSO    |
|----------|-----------|---------|---------|---------|---------|---------|---------|
| $\alpha$ | 30.89°    | 29.42°  | 28.70°  | 28.61°  | 28.28°  | 28.26°  | 28.24°  |
| $\gamma$ | 170.70°   | 169.23° | 168.05° | 167.91° | 167.42° | 167.39° | 167.36° |

gas-phase refers to the Solvent-free model, and Toluene, DCM, THF, MeOH, DMF, DMSO are toluene, dichloromethane, tetrahydrofuran, *N,N*-dimethylformamide, and dimethyl sulfoxide, respectively, by PCM.



**Frontier molecular orbitals.**

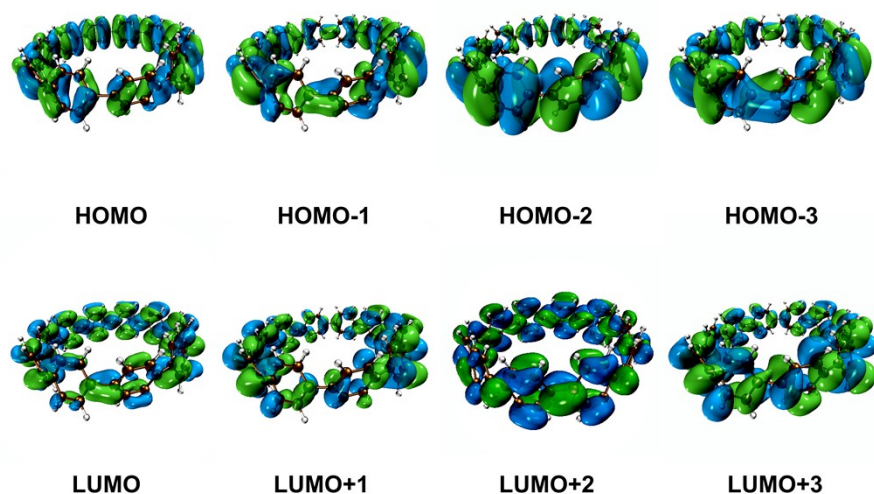

**Figure S12** Frontier molecular orbitals of [10]CPP in gas phase: HOMO, HOMO-1, HOMO-2, HOMO-3, LUMO, LUMO+1, LUMO+2, and LUMO+3.

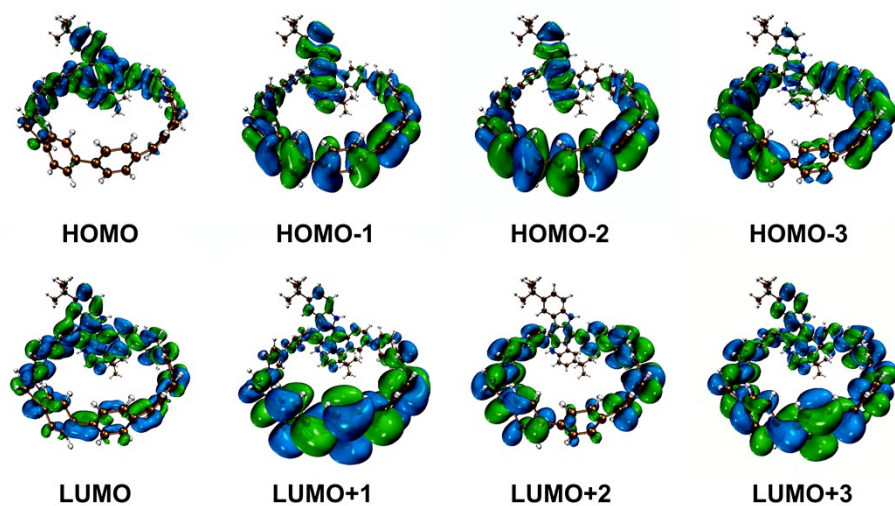

**Figure S13.** Frontier molecular orbitals of BH-ICZ[10]CPP in gas phase: HOMO, HOMO-1, HOMO-2, HOMO-3, LUMO, LUMO+1, LUMO+2, and LUMO+3.

**Table S4.** Molecule Orbitals Energy (eV) for **BH-ICZ[10]CPP**.

|                | <b>HOMO-3</b> | <b>HOMO-1</b> | <b>HOMO</b> | <b>LUMO</b> | <b>LUMO+2</b> | <b>LUMO+4</b> |
|----------------|---------------|---------------|-------------|-------------|---------------|---------------|
| <b>Toluene</b> | -6.780        | -6.498        | -5.767      | -0.989      | -0.199        | 0.866         |
| <b>THF</b>     | -6.826        | -6.553        | -5.810      | -1.083      | -0.252        | 0.678         |
| <b>DCM</b>     | -6.831        | -6.560        | -5.816      | -1.095      | -0.260        | 0.670         |
| <b>MeOH</b>    | -6.859        | -6.589        | -5.840      | -1.145      | -0.291        | 0.639         |
| <b>DMF</b>     | -6.861        | -6.590        | -5.845      | -1.147      | -0.293        | 0.637         |
| <b>DMSO</b>    | -6.863        | -6.593        | -5.847      | -1.152      | -0.296        | 0.634         |
|                |               |               |             |             |               |               |

**Table S5.** Molecule Orbitals Energy-gap(eV) for **BH-ICZ[10]CPP**.

|                | <b>HOMO - LUMO+2</b> | <b>HOMO-3 - LUMO</b> | <b>HOMO - LUMO+4</b> | <b>HOMO-1 - LUMO+2</b> |
|----------------|----------------------|----------------------|----------------------|------------------------|
| <b>Toluene</b> | 5.5682               | 5.791                | 6.6333               | 6.2994                 |
| <b>THF</b>     | 5.558                | 5.7424               | 6.488                | 6.3009                 |
| <b>DCM</b>     | 5.5561               | 5.736                | 6.4861               | 6.2999                 |
| <b>MeOH</b>    | 5.5516               | 5.7145               | 6.4817               | 6.2973                 |
| <b>DMF</b>     | 5.5514               | 5.7133               | 6.4815               | 6.2971                 |
| <b>DMSO</b>    | 5.551                | 5.7116               | 6.4811               | 6.2968                 |

**Table S6.** BH-ICZ[10]CPP for HOMO, LUMO, and Energy-gap ( $E_g$ ) in different solvents.

|                                                                                                                                                                 | <b>Tol</b> | <b>THF</b> | <b>DCM</b> | <b>MeOH</b> | <b>DMF</b> | <b>DMSO</b> |
|-----------------------------------------------------------------------------------------------------------------------------------------------------------------|------------|------------|------------|-------------|------------|-------------|
| <b>HOMO</b>                                                                                                                                                     | -5.77      | -5.81      | -5.82      | -5.84       | -5.84      | -5.85       |
| <b>LUMO</b>                                                                                                                                                     | -0.99      | -1.08      | -1.10      | -1.14       | -1.15      | -1.15       |
| <b>Energy-gap (<math>E_g</math>)</b>                                                                                                                            | 4.78       | 4.73       | 4.72       | 4.70        | 4.69       | 4.70        |
|                                                                                                                                                                 | 460.96     | 456.08     | 455.44     | 453.32      | 453.21     | 453.03      |
| The above solvent model PCM. Except for the red is kJ/mol, and the other units are eV. The energy gap ( $E_g$ ) refers to the energy-gap between LUMO and HOMO. |            |            |            |             |            |             |

**Table S7** Oscillator strengths and transitions of the peaks from DFT calculations under the theoretical level of (CAM-B3LYP/6-31G(d,p)//PCM)

| $\lambda_{\text{DFT}}$ | $f_{\text{osc}}$ | Transitions                                                                                                                                 |
|------------------------|------------------|---------------------------------------------------------------------------------------------------------------------------------------------|
| <b>[10]CPP</b>         |                  |                                                                                                                                             |
| <b>452.10 nm</b>       | 0.000            | HOMO -> LUMO 85.8%                                                                                                                          |
| <b>349.92 nm</b>       | 2.726            | HOMO-2 -> LUMO 42.2%, HOMO -> LUMO+1 39.5%                                                                                                  |
| <b>330.97 nm</b>       | 1.418            | HOMO-1 -> LUMO+2 31.8%, HOMO-1 -> LUMO 21.3%,<br>HOMO -> LUMO+2 20.2%, HOMO-2 -> LUMO+1 12.1%                                               |
| <b>289.44 nm</b>       | 0.004            | HOMO -> LUMO+1 32.8%, HOMO-2 -> LUMO 31.6%,<br>HOMO -> LUMO+5 9.6%                                                                          |
| <b>287.70 nm</b>       | 0.294            | HOMO-1 -> LUMO+2 30.5%, HOMO-2 -> LUMO+1 16.8%,<br>HOMO-4 -> LUMO 16.7%, HOMO -> LUMO+4 14.0%                                               |
| <b>BH-ICZ[10]CPP</b>   |                  |                                                                                                                                             |
| <b>482.71 nm</b>       | 0.729            | HOMO -> LUMO 90.0%                                                                                                                          |
| <b>379.88 nm</b>       | 0.551            | HOMO-2 -> LUMO 63.0%, HOMO-1 -> LUMO 22.4%,<br>HOMO-2 -> LUMO+1 5.1%                                                                        |
| <b>342.72 nm</b>       | 0.660            | HOMO-1 -> LUMO+1 36.1%, HOMO-1 -> LUMO 11.5%,<br>HOMO-3 -> LUMO+2 10.4%, HOMO -> LUMO+1 9.4%,<br>HOMO-2 -> LUMO+1 7.7%, HOMO-2 -> LUMO 7.4% |
| <b>338.75 nm</b>       | 2.458            | HOMO -> LUMO+2 35.4%, HOMO-3 -> LUMO 31.9%,<br>HOMO -> LUMO+4 5.7%, HOMO-1 -> LUMO+2 5.3%                                                   |
| <b>313.84 nm</b>       | 1.351            | HOMO-4 -> LUMO 36.6%, HOMO-1 -> LUMO+1 15.7%,<br>HOMO -> LUMO+3 11.5%, HOMO-2 -> LUMO+1 6.3%                                                |

**Table S8.** Energy and Strain energy for **[10]CPP**, **H-ICZ[10]CPP**, **BH-ICZ[10]CPP**, and **B-ICZ[10]CPP**

|              |               | Functional unit | Biphenyl    | Triphenyl   | strain energy (kcal/mol) |            |
|--------------|---------------|-----------------|-------------|-------------|--------------------------|------------|
|              | [10]CPP       | /               | -463.055386 | -693.987582 | 185.722591               |            |
| Energy(a.u.) | -2309.251222  |                 |             |             |                          |            |
|              | H-ICZ[10]CPP  | -1264.159778    |             |             | 216.509199               |            |
| Energy(a.u.) | -2879.411431  |                 |             |             |                          |            |
|              | BH-ICZ[10]CPP | -1578.496605    |             |             |                          | 217.194454 |
| Energy(a.u.) | -3193.748519  |                 |             |             |                          |            |

## Charge-transfer spectra.

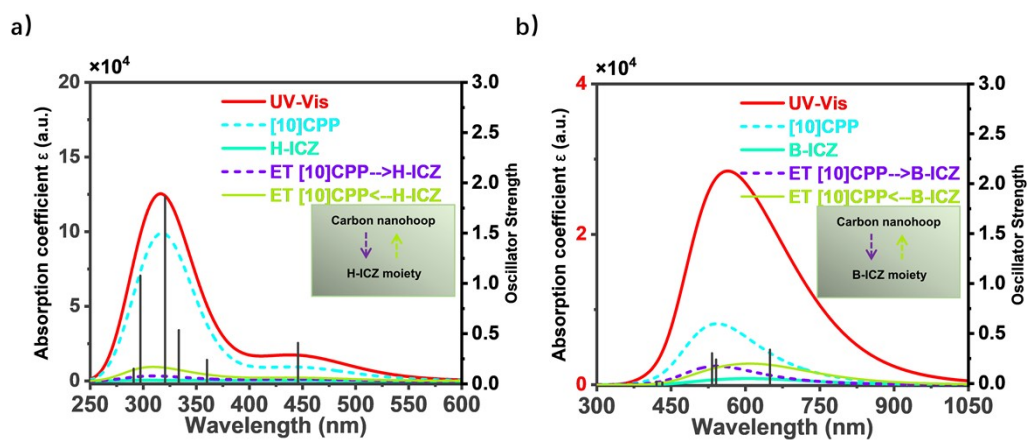

**Figure S14.** a) H-ICZ[10]CPP and b) B-ICZ[10]CPP of the charge-transfer spectra (CTS).

## Interfragment charge transfer.

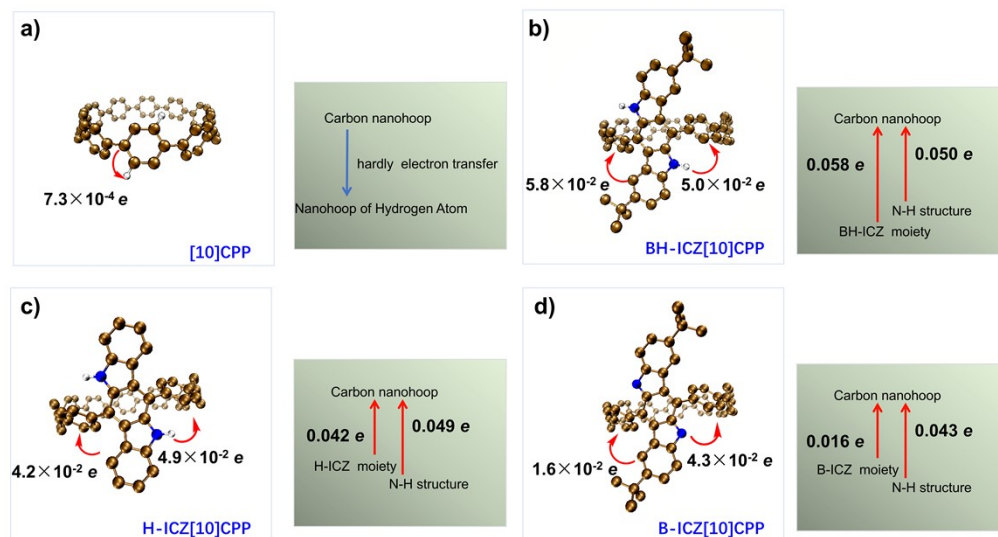

**Figure S15.** Interfragment charge transfer between the [10]CPP parent and the modified fragments in [10]CPP, BH-ICZ[10]CPP, H-ICZ[10]CPP, and B-ICZ[10]CPP.

**[10]CPP**

| <b>Atom</b> | <b>X</b> | <b>Y</b> | <b>Z</b> |            |         |          |          |
|-------------|----------|----------|----------|------------|---------|----------|----------|
|             |          |          |          | <b>43C</b> | -2.2899 | -12.3853 | -2.7051  |
| <b>1C</b>   | 4.2407   | 9.9873   | -6.2358  | <b>44C</b> | -4.5287 | -12.6993 | -1.3121  |
| <b>2C</b>   | 3.9519   | 8.5197   | -8.3800  | <b>45C</b> | -4.5159 | -12.6877 | 1.2981   |
| <b>3C</b>   | 1.6962   | 8.5378   | -9.7633  | <b>46C</b> | -2.2595 | -12.3542 | 2.6722   |
| <b>4C</b>   | -0.1141  | 10.3528  | -9.0913  | <b>47H</b> | 1.7936  | -12.1821 | 2.2329   |
| <b>5C</b>   | 0.1725   | 11.8207  | -6.9445  | <b>48H</b> | 1.7604  | -12.1976 | -2.3312  |
| <b>6C</b>   | 2.2843   | 11.5445  | -5.3627  | <b>49H</b> | -6.3199 | -12.8636 | -2.2972  |
| <b>7H</b>   | 5.9141   | 9.7235   | -5.0834  | <b>50H</b> | -6.2984 | -12.8536 | 2.2966   |
| <b>8H</b>   | 5.4070   | 7.1520   | -8.8400  | <b>51C</b> | -2.2843 | -11.5445 | -5.3627  |
| <b>9H</b>   | -1.8243  | 10.5409  | -10.2081 | <b>52C</b> | -4.2407 | -9.9873  | -6.2358  |
| <b>10H</b>  | -1.3171  | 13.1322  | -6.4283  | <b>53C</b> | -0.1725 | -11.8207 | -6.9445  |
| <b>11C</b>  | 2.2899   | 12.3853  | -2.7051  | <b>54C</b> | -3.9519 | -8.5197  | -8.3800  |
| <b>12C</b>  | 4.5287   | 12.6993  | -1.3121  | <b>55H</b> | -5.9141 | -9.7235  | -5.0834  |
| <b>13C</b>  | 0.0184   | 12.4163  | -1.3379  | <b>56C</b> | 0.1141  | -10.3528 | -9.0913  |
| <b>14C</b>  | 4.5159   | 12.6877  | 1.2981   | <b>57H</b> | 1.3171  | -13.1322 | -6.4283  |
| <b>15H</b>  | 6.3199   | 12.8636  | -2.2972  | <b>58C</b> | -1.6962 | -8.5378  | -9.7633  |
| <b>16C</b>  | 0.0008   | 12.4072  | 1.2716   | <b>59H</b> | -5.4070 | -7.1520  | -8.8400  |
| <b>17H</b>  | -1.7604  | 12.1976  | -2.3312  | <b>60H</b> | 1.8243  | -10.5409 | -10.2081 |
| <b>18C</b>  | 2.2595   | 12.3542  | 2.6722   | <b>61C</b> | -1.1122 | -6.3776  | -11.4409 |
| <b>19H</b>  | 6.2984   | 12.8536  | 2.2966   | <b>62C</b> | -2.9938 | -4.9733  | -12.6681 |
| <b>20H</b>  | -1.7936  | 12.1821  | 2.2329   | <b>63C</b> | 1.3283  | -5.3577  | -11.4169 |
| <b>21C</b>  | 1.1122   | 6.3776   | -11.4409 | <b>64C</b> | -2.5343 | -2.5341  | -13.5031 |
| <b>22C</b>  | -1.3283  | 5.3577   | -11.4169 | <b>65H</b> | -4.8779 | -5.7589  | -12.8681 |
| <b>23C</b>  | 2.9938   | 4.9733   | -12.6681 | <b>66C</b> | 1.7869  | -2.9210  | -12.2506 |
| <b>24C</b>  | -1.7869  | 2.9210   | -12.2506 | <b>67H</b> | 2.8433  | -6.3843  | -10.4947 |
| <b>25H</b>  | -2.8433  | 6.3843   | -10.4947 | <b>68C</b> | -0.1725 | -1.3888  | -13.1491 |
| <b>26C</b>  | 2.5343   | 2.5341   | -13.5031 | <b>69H</b> | -4.0682 | -1.4585  | -14.3383 |
| <b>27H</b>  | 4.8779   | 5.7589   | -12.8681 | <b>70H</b> | 3.6468  | -2.1125  | -11.9560 |
| <b>28C</b>  | 0.1725   | 1.3888   | -13.1491 | <b>71C</b> | -2.2315 | -11.5265 | 5.3112   |
| <b>29H</b>  | -3.6468  | 2.1125   | -11.9560 | <b>72C</b> | -4.2954 | -10.1796 | 6.3230   |
| <b>30H</b>  | 4.0682   | 1.4585   | -14.3383 | <b>73C</b> | -0.0274 | -11.6085 | 6.8130   |
| <b>31C</b>  | 2.2315   | 11.5265  | 5.3112   | <b>74C</b> | -4.0549 | -8.7152  | 8.4574   |
| <b>32C</b>  | 0.0274   | 11.6085  | 6.8130   | <b>75H</b> | -6.0578 | -10.0991 | 5.2820   |
| <b>33C</b>  | 4.2954   | 10.1796  | 6.3230   | <b>76C</b> | 0.2220  | -10.1459 | 8.9462   |
| <b>34C</b>  | -0.2220  | 10.1459  | 8.9462   | <b>77H</b> | 1.5438  | -12.7945 | 6.2406   |
| <b>35H</b>  | -1.5438  | 12.7945  | 6.2406   | <b>78C</b> | -1.7167 | -8.4717  | 9.7365   |
| <b>36C</b>  | 4.0549   | 8.7152   | 8.4574   | <b>79H</b> | -5.6430 | -7.5484  | 9.0107   |
| <b>37H</b>  | 6.0578   | 10.0991  | 5.2820   | <b>80H</b> | 1.9826  | -10.2304 | 9.9900   |
| <b>38C</b>  | 1.7167   | 8.4717   | 9.7365   | <b>81C</b> | 1.2446  | 6.3617   | 11.4085  |
| <b>39H</b>  | -1.9826  | 10.2304  | 9.9900   | <b>82C</b> | -1.2520 | 5.5182   | 11.9163  |
| <b>40H</b>  | 5.6430   | 7.5484   | 9.0107   | <b>83C</b> | 3.2111  | 4.7519   | 12.2817  |
| <b>41C</b>  | -9.7601  | -12.4072 | 1.2716   | <b>84C</b> | -1.7352 | 3.1185   | 12.7596  |
| <b>42C</b>  | -0.0184  | -12.4163 | -1.3379  | <b>85H</b> | -2.8444 | 6.7109   | 11.4336  |

|            |         |         |         |             |         |         |         |
|------------|---------|---------|---------|-------------|---------|---------|---------|
| <b>86C</b> | 2.7343  | 2.3534  | 13.1250 | <b>94C</b>  | -3.2111 | -4.7519 | 12.2817 |
| <b>87H</b> | 5.1542  | 5.3980  | 12.2180 | <b>95H</b>  | -4.3180 | -1.1870 | 13.6952 |
| <b>88C</b> | 0.2399  | 1.3359  | 13.1631 | <b>96C</b>  | 1.2520  | -5.5182 | 11.9163 |
| <b>89H</b> | -3.6879 | 2.5256  | 12.9140 | <b>97H</b>  | 3.6879  | -2.5256 | 12.9140 |
| <b>90H</b> | 4.3180  | 1.1870  | 13.6952 | <b>98C</b>  | -1.2446 | -6.3617 | 11.4085 |
| <b>91C</b> | -0.2399 | -1.3359 | 13.1631 | <b>99H</b>  | -5.1542 | -5.3980 | 12.2180 |
| <b>92C</b> | -2.7343 | -2.3534 | 13.1250 | <b>100H</b> | 2.8444  | -6.7109 | 11.4336 |
| <b>93C</b> | 1.7352  | -3.1185 | 12.7596 |             |         |         |         |

# BH-ICZ[10]CPP

| Atom       | X        | Y       | Z       | <b>34C</b> | 8.1926  | 4.2379  | 14.4197 |
|------------|----------|---------|---------|------------|---------|---------|---------|
| <b>1C</b>  | -10.6786 | -5.1734 | 6.5078  | <b>35H</b> | 5.3140  | 5.0865  | 17.1055 |
| <b>2C</b>  | -9.9518  | -5.0264 | 9.0184  | <b>36C</b> | 8.5840  | -0.0846 | 13.1946 |
| <b>3C</b>  | -10.8130 | -3.0737 | 10.5757 | <b>37H</b> | 5.9086  | -2.6441 | 14.7271 |
| <b>4C</b>  | -12.7032 | -1.4957 | 9.6094  | <b>38C</b> | 9.3283  | 2.4279  | 12.8631 |
| <b>5C</b>  | -13.4492 | -1.6600 | 7.1032  | <b>39H</b> | 8.8033  | 6.1937  | 14.3119 |
| <b>6C</b>  | -12.3136 | -3.3863 | 5.4447  | <b>40H</b> | 9.4275  | -1.5447 | 12.0290 |
| <b>7H</b>  | -9.7601  | -6.5516 | 5.3018  | <b>41C</b> | 10.8130 | 3.0737  | 10.5757 |
| <b>8H</b>  | -8.4940  | -6.2927 | 9.7077  | <b>42C</b> | 12.7032 | 1.4957  | 9.6094  |
| <b>9H</b>  | -13.5163 | -0.0410 | 10.8063 | <b>43C</b> | 9.9518  | 5.0264  | 9.0184  |
| <b>10H</b> | -14.8493 | -0.3395 | 6.3955  | <b>44C</b> | 13.4492 | 1.6600  | 7.1032  |
| <b>11C</b> | -9.3283  | -2.4279 | 12.8631 | <b>45H</b> | 13.5163 | 0.0410  | 10.8063 |
| <b>12C</b> | -8.5840  | 0.0846  | 13.1946 | <b>46C</b> | 10.6786 | 5.1734  | 6.5078  |
| <b>13C</b> | -8.1926  | -4.2379 | 14.4197 | <b>47H</b> | 8.4940  | 6.2927  | 9.7077  |
| <b>14C</b> | -6.5704  | 0.7073  | 14.7428 | <b>48C</b> | 12.3136 | 3.3863  | 5.4447  |
| <b>15H</b> | -9.4275  | 1.5447  | 12.0290 | <b>49H</b> | 14.8493 | 0.3395  | 6.3955  |
| <b>16C</b> | -6.1974  | -3.6038 | 15.9995 | <b>50H</b> | 9.7601  | 6.5516  | 5.3018  |
| <b>17H</b> | -8.8033  | -6.1937 | 14.3119 | <b>51C</b> | 5.8796  | -1.3309 | -6.1759 |
| <b>18C</b> | -5.2174  | -1.1437 | 16.0617 | <b>52C</b> | 7.8120  | -0.8875 | -4.4982 |
| <b>19H</b> | -5.9086  | 2.6441  | 14.7271 | <b>53C</b> | 9.2628  | 1.3391  | -4.5772 |
| <b>20H</b> | -5.3140  | -5.0865 | 17.1055 | <b>54C</b> | 8.8301  | 2.9650  | -6.6320 |
| <b>21C</b> | -2.6286  | -0.5667 | 16.9906 | <b>55C</b> | 6.9037  | 2.5188  | -8.3451 |
| <b>22C</b> | -1.7544  | 1.9202  | 17.2176 | <b>56H</b> | 4.6797  | -2.9613 | -5.8902 |
| <b>23C</b> | -0.8043  | -2.4730 | 17.1814 | <b>57H</b> | 8.0648  | -2.1951 | -2.9420 |
| <b>24C</b> | 0.8043   | 2.4730  | 17.1814 | <b>58H</b> | 10.0234 | 4.6157  | -6.8835 |
| <b>25H</b> | -3.0846  | 3.4780  | 17.2514 | <b>59H</b> | 6.7241  | 3.7666  | -9.9653 |
| <b>26C</b> | 1.7544   | -1.9202 | 17.2176 | <b>60C</b> | 10.8181 | 1.9858  | -2.3633 |
| <b>27H</b> | -1.3671  | -4.4411 | 17.1030 | <b>61C</b> | 10.9696 | 4.4772  | -1.4701 |
| <b>28C</b> | 2.6286   | 0.5667  | 16.9906 | <b>62C</b> | 11.8169 | 0.0928  | -0.7987 |
| <b>29H</b> | 1.3671   | 4.4411  | 17.1030 | <b>63C</b> | 11.7315 | 4.9959  | 0.9817  |
| <b>30H</b> | 3.0846   | -3.4780 | 17.2514 | <b>64H</b> | 10.2834 | 6.0144  | -2.6417 |
| <b>31C</b> | 5.2174   | 1.1437  | 16.0617 | <b>65C</b> | 12.5527 | 0.6101  | 1.6536  |
| <b>32C</b> | 6.1974   | 3.6038  | 15.9995 | <b>66H</b> | 11.8820 | -1.8439 | -1.4668 |
| <b>33C</b> | 6.5704   | -0.7073 | 14.7428 | <b>67C</b> | 12.3648 | 3.0508  | 2.6641  |

|             |          |         |          |             |          |          |          |
|-------------|----------|---------|----------|-------------|----------|----------|----------|
| <b>68H</b>  | 11.6883  | 6.9371  | 1.6415   | <b>107H</b> | 3.5517   | 5.4787   | -9.3130  |
| <b>69H</b>  | 13.0949  | -0.9507 | 2.8655   | <b>108C</b> | 2.4698   | -4.7107  | -9.8623  |
| <b>70C</b>  | -12.3648 | -3.0508 | 2.6641   | <b>109C</b> | 0.3442   | -6.3195  | -9.8183  |
| <b>71C</b>  | -11.7315 | -4.9959 | 0.9817   | <b>110C</b> | 4.8728   | -5.7870  | -10.1488 |
| <b>72C</b>  | -12.5527 | -0.6101 | 1.6536   | <b>111C</b> | 0.5628   | -8.9283  | -10.0099 |
| <b>73C</b>  | -10.9696 | -4.4772 | -1.4701  | <b>112C</b> | 5.1477   | -8.3923  | -10.3507 |
| <b>74H</b>  | -11.6883 | -6.9371 | 1.6415   | <b>113H</b> | 6.5060   | -4.5614  | -10.2062 |
| <b>75C</b>  | -11.8169 | -0.0928 | -0.7987  | <b>114C</b> | 2.9673   | -9.9269  | -10.2655 |
| <b>76H</b>  | -13.0949 | 0.9507  | 2.8655   | <b>115H</b> | -1.0880  | -10.1445 | -9.9691  |
| <b>77C</b>  | -10.8181 | -1.9858 | -2.3633  | <b>116H</b> | 3.1637   | -11.9611 | -10.4154 |
| <b>78H</b>  | -10.2834 | -6.0144 | -2.6417  | <b>117N</b> | -1.7859  | -4.8313  | -9.6001  |
| <b>79H</b>  | -11.8820 | 1.8439  | -1.4668  | <b>118H</b> | -3.5517  | -5.4787  | -9.3130  |
| <b>80C</b>  | -9.2628  | -1.3391 | -4.5772  | <b>119C</b> | 7.7417   | -9.6511  | -10.6526 |
| <b>81C</b>  | -7.8120  | 0.8875  | -4.4982  | <b>120C</b> | 9.9009   | -7.7201  | -10.7021 |
| <b>82C</b>  | -8.8301  | -2.9650 | -6.6320  | <b>121C</b> | 8.2041   | -11.4636 | -8.4247  |
| <b>83C</b>  | -5.8796  | 1.3309  | -6.1759  | <b>122C</b> | 7.8120   | -11.1512 | -13.1435 |
| <b>84H</b>  | -8.0648  | 2.1951  | -2.9420  | <b>123H</b> | 9.7250   | -6.4140  | -12.2938 |
| <b>85C</b>  | -6.9037  | -2.5188 | -8.3451  | <b>124H</b> | 9.9786   | -6.6082  | -8.9618  |
| <b>86H</b>  | -10.0234 | -4.6157 | -6.8835  | <b>125H</b> | 11.7073  | -8.7044  | -10.8992 |
| <b>87C</b>  | -5.2350  | -0.4398 | -8.0737  | <b>126H</b> | 6.7703   | -12.9465 | -8.3268  |
| <b>88H</b>  | -4.6797  | 2.9613  | -5.8902  | <b>127H</b> | 10.0474  | -12.3828 | -8.6160  |
| <b>89H</b>  | -6.7241  | -3.7666 | -9.9653  | <b>128H</b> | 8.1788   | -10.4424 | -6.6280  |
| <b>90C</b>  | -2.7806  | -0.2076 | -9.2731  | <b>129H</b> | 9.6527   | -12.0645 | -13.3817 |
| <b>91C</b>  | -1.1359  | -2.3247 | -9.5624  | <b>130H</b> | 6.3678   | -12.6262 | -13.1951 |
| <b>92C</b>  | -1.5348  | 2.1581  | -9.6298  | <b>131H</b> | 7.4986   | -9.9048  | -14.7618 |
| <b>93C</b>  | 1.5348   | -2.1581 | -9.6298  | <b>132C</b> | -7.7417  | 9.6511   | -10.6526 |
| <b>94C</b>  | 1.1359   | 2.3247  | -9.5624  | <b>133C</b> | -9.9009  | 7.7201   | -10.7021 |
| <b>95C</b>  | 2.7806   | 0.2076  | -9.2731  | <b>134C</b> | -8.2041  | 11.4636  | -8.4247  |
| <b>96C</b>  | 5.2350   | 0.4398  | -8.0737  | <b>135C</b> | -7.8120  | 11.1512  | -13.1435 |
| <b>97C</b>  | -2.4698  | 4.7107  | -9.8623  | <b>136H</b> | -9.7250  | 6.4140   | -12.2938 |
| <b>98C</b>  | -0.3442  | 6.3195  | -9.8183  | <b>137H</b> | -9.9786  | 6.6082   | -8.9618  |
| <b>99C</b>  | -4.8728  | 5.7870  | -10.1488 | <b>138H</b> | -11.7073 | 8.7044   | -10.8992 |
| <b>100C</b> | -0.5628  | 8.9283  | -10.0099 | <b>139H</b> | -6.7703  | 12.9465  | -8.3268  |
| <b>101C</b> | -5.1477  | 8.3923  | -10.3507 | <b>140H</b> | -10.0474 | 12.3828  | -8.6160  |
| <b>102H</b> | -6.5060  | 4.5614  | -10.2062 | <b>141H</b> | -8.1788  | 10.4424  | -6.6280  |
| <b>103C</b> | -2.9673  | 9.9269  | -10.2655 | <b>142H</b> | -9.6527  | 12.0645  | -13.3817 |
| <b>104H</b> | 1.0880   | 10.1445 | -9.9691  | <b>143H</b> | -6.3678  | 12.6262  | -13.1951 |
| <b>105H</b> | -3.1637  | 11.9611 | -10.4154 | <b>144H</b> | -7.4986  | 9.9048   | -14.7618 |
| <b>106N</b> | 1.7859   | 4.8313  | -9.6001  |             |          |          |          |



## Reference

1. L. Xing, Y. An, Y. Qin, H. Xin, T. Deng, K. Meng, D. Liu and W. Xue, *New J. Chem.*, 2024, **48**, 117-130.
2. M. Zhao, B. Zhang and Q. Miao, *Angew. Chem. Int. Ed.*, 2020, **132**, 9765-9770.
3. C. Zhu, X. Ji, D. You, T. L. Chen, A. U. Mu, K. P. Barker, L. M. Klivansky, Y. Liu and L. Fang, *J. Am. Chem. Soc.*, 2018, **140**, 18173-18182.
4. E. S. Hirst and R. Jasti, *J. Org. Chem.*, 2012, **77**, 10473-10478.
5. M. J. Frisch, G. W. Trucks, H. B. Schlegel, G. E. Scuseria, M. A. Robb, J. R. Cheeseman, G. Scalmani, V. Barone, G. A. Petersson, H. Nakatsuji, X. Li, M. Caricato, A. V. Marenich, J. Bloino, B. G. Janesko, R. Gomperts, B. Mennucci, H. P. Hratchian, J. V. Ortiz, A. F. Izmaylov, J. L. Sonnenberg, Williams, F. Ding, F. Lipparini, F. Egidi, J. Goings, B. Peng, A. Petrone, T. Henderson, D. Ranasinghe, V. G. Zakrzewski, J. Gao, N. Rega, G. Zheng, W. Liang, M. Hada, M. Ehara, K. Toyota, R. Fukuda, J. Hasegawa, M. Ishida, T. Nakajima, Y. Honda, O. Kitao, H. Nakai, T. Vreven, K. Throssell, J. A. Montgomery Jr., J. E. Peralta, F. Ogliaro, M. J. Bearpark, J. J. Heyd, E. N. Brothers, K. N. Kudin, V. N. Staroverov, T. A. Keith, R. Kobayashi, J. Normand, K. Raghavachari, A. P. Rendell, J. C. Burant, S. S. Iyengar, J. Tomasi, M. Cossi, J. M. Millam, M. Klene, C. Adamo, R. Cammi, J. W. Ochterski, R. L. Martin, K. Morokuma, O. Farkas, J. B. Foresman and D. J. Fox, *Journal*, 2016.
6. S. Grimme, S. Ehrlich and L. Goerigk, *J. Comput. Chem.*, 2011, **32**, 1456-1465.
7. Y. Segawa, H. Omachi and K. Itami, *Org. Lett.*, 2010, **12**, 2262-2265.
8. H. Takaba, H. Omachi, Y. Yamamoto, J. Bouffard and K. Itami, *Angew. Chem. Int. Ed.*, 2009, **48**, 6112-6116.
9. A. Mischie, A. M. Toader, M. C. Buta and F. Cimpoesu, *Comput. Theor. Chem.*, 2023, **1230**, 114370.
